# Supplementary material
Source: Royal Society of Chemistry journal article supplement (doi:10.1039/d6nj01086e)
Supplement: d6nj01086e1.pdf [file d6nj01086e1.pdf]

1  
2  
3  
4  
5  
6  
7  
8  
9  
10  
11  
12  
13  
14

## Supplementary Information

### Acceptor Engineering Boosting Piezoelectricity in Conjugated Microporous Polymers for Piezo-photocatalytic Uranium Separation

Zucheng Dong,<sup>a†</sup> Shuwen Chena,<sup>a†</sup> Zifan Li,<sup>a,b</sup> Zhongye Wu,<sup>a</sup> Xiaohong Cao,<sup>\*a</sup> Yunhai Liu,<sup>a</sup> Bin  
Tang,<sup>\*b</sup> and Zhibin Zhang<sup>\*a,b</sup>

*a National Key Laboratory of Uranium Resources Exploration-Mining and Nuclear Remote  
Sensing, East China University of Technology, Nanchang, Jiangxi 330013, P.R. China.*

*b Engineering Research Center of Nuclear Technology Application, Ministry of Education, East  
China University of Technology, Nanchang, Jiangxi 330013, P.R. China.*

*\* Corresponding author*

*† These authors contributed equally to this work.*

**\*Corresponding Authors:** E-mail: [xhcao@ecut.edu.cn](mailto:xhcao@ecut.edu.cn) (X.H. Cao), [tangbin@ecit.cn](mailto:tangbin@ecit.cn) (B. Tang),  
[zhbzhang@ecut.edu.cn](mailto:zhbzhang@ecut.edu.cn) (Z.B. Zhang)

## 15 **S1. Materials**

16 All chemicals utilized in this study were of analytical grade and used as received without further  
17 purification. The monomers 3,6-dibromocarbazole, 1,4-benzenediboronic acid bis(pinacol) ester, 2,5-  
18 dibromobenzonitrile, and 2,5-dibromoterephthalonitrile were acquired from Jilin Chinese Academy  
19 of Sciences-Yanshen Technology Co., Ltd. All other reagents were supplied by Adamas-Beta.  
20 Deionized water (18 M $\Omega$ ·cm) was employed for all aqueous solutions throughout the experiments.

## 21 **S2. Characterization methods**

22 Powder X-ray diffraction (PXRD) patterns were recorded on a Bruker D8 Advance diffractometer  
23 to analyze the crystallinity. Chemical structures were verified using Fourier-transform infrared  
24 spectroscopy (FT-IR, Bruker Tensor II) and solid-state <sup>13</sup>C NMR spectroscopy (Avance III HD 500  
25 MHz). Surface elemental compositions were determined via X-ray photoelectron spectroscopy (XPS,  
26 AXIS Supra+). Porosity parameters, including specific surface area and pore size distribution, were  
27 evaluated using nitrogen adsorption-desorption isotherms at 77 K on a Brunauer-Emmett-Teller  
28 (BET) analyzer (BSD-660M) The Electron paramagnetic resonance spectroscopy spectra were  
29 measured on CIQTEK EPR200-Plus with continues-wave X band frequency. The 5,5-dimethyl-1-  
30 pyrroline N-oxide (DMPO) was employed as a probe under  $\lambda > 420$  nm light irradiation. Piezoelectric  
31 properties were characterized using a commercial Piezoresponse Force Microscopy (PFM) system  
32 (Bruker Dimension Icon). Vertical PFM (V-PFM) measurements were conducted by applying an AC  
33 voltage to a conductive AFM tip, with the bottom electrode grounded. For domain imaging and  
34 switching spectroscopy, a drive amplitude of 10 V AC was employed.

## 35 **S3 Fabrication of piezoelectric nanogenerator (PENG)**

36 PENG devices were fabricated following established protocols [1]. Briefly, conductive electrodes  
37 were prepared by depositing silver layers (0.7 $\times$ 0.7 cm<sup>2</sup>) onto two silicon substrates (1.2 $\times$ 1.2 cm<sup>2</sup>).  
38 Copper wires were attached to these electrodes via soldering for electrical connection. To construct  
39 the device, Kapton tape was first applied to the perimeter of the bottom electrode to create a mold. A  
40 polydimethylsiloxane (PDMS) film (0.40 mm thick) with a central cutout matching the electrode area  
41 (0.5 $\times$ 0.5 cm<sup>2</sup>) was then positioned on the substrate. The synthesized CMP powder (5 mg) was tightly  
42 packed into this cavity. The top electrode was subsequently aligned and secured with tape. Finally,  
43 the entire sandwich structure was encapsulated using Kapton tape to ensure mechanical stability. All  
44 electrical output measurements were performed under a constant applied force.

45

#### 46 S4 DFT calculations

47 The calculations based on the density function theory (DFT) and time-dependent-density  
48 functional theory (TD-DFT) are carried out using the Gaussian package. In DFT calculations, the  
49 reaction mechanism, used to identify the energy paths, is performed on the B3LYP/Def2-SVP level.  
50 The vibrational frequency analyses were used to verify the minimum character of the configurations.  
51 In TD-DFT calculations, the excited states of optimized geometry are performed on the CAM-  
52 B3LYP/Def2-SVP level. The electron distributions at these exciting statuses were obtained with  
53 Multiwfn and Vesta. For all the calculations, the dispersion force contributed to energy is considered  
54 using the Grimme D3 method, and the solvent effect was described by a conductor-like polarizable  
55 continuum model (C-PCM).

#### 56 S5. Figures

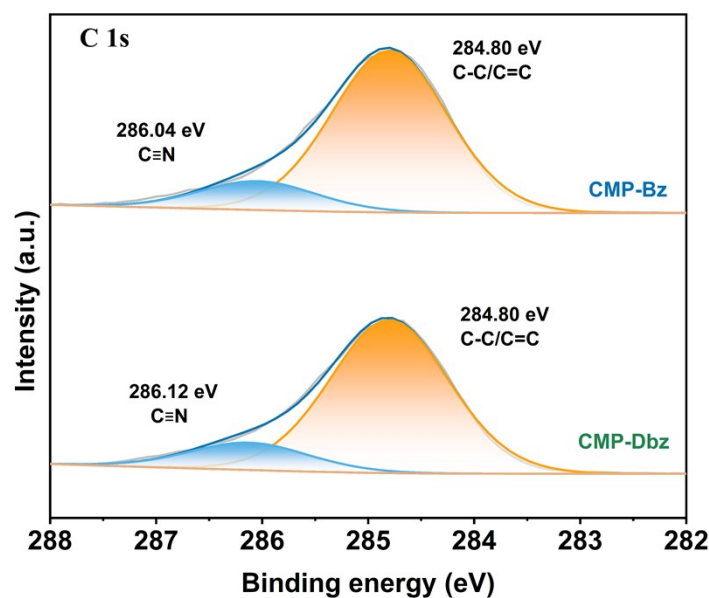

57

58 Fig.S1. High-resolution XPS spectra of C 1s for the synthesized CMPs.

59

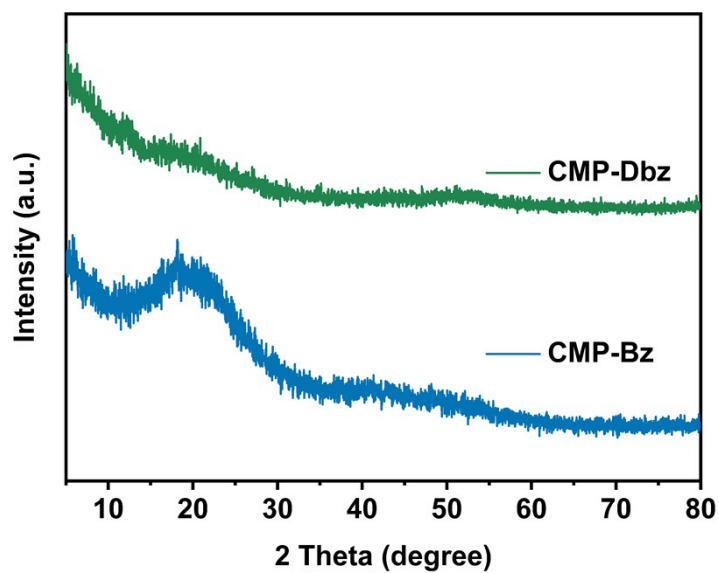

60

61

Fig.S2. The PXRD of CMP-Bz and CMP-Dbz.

62

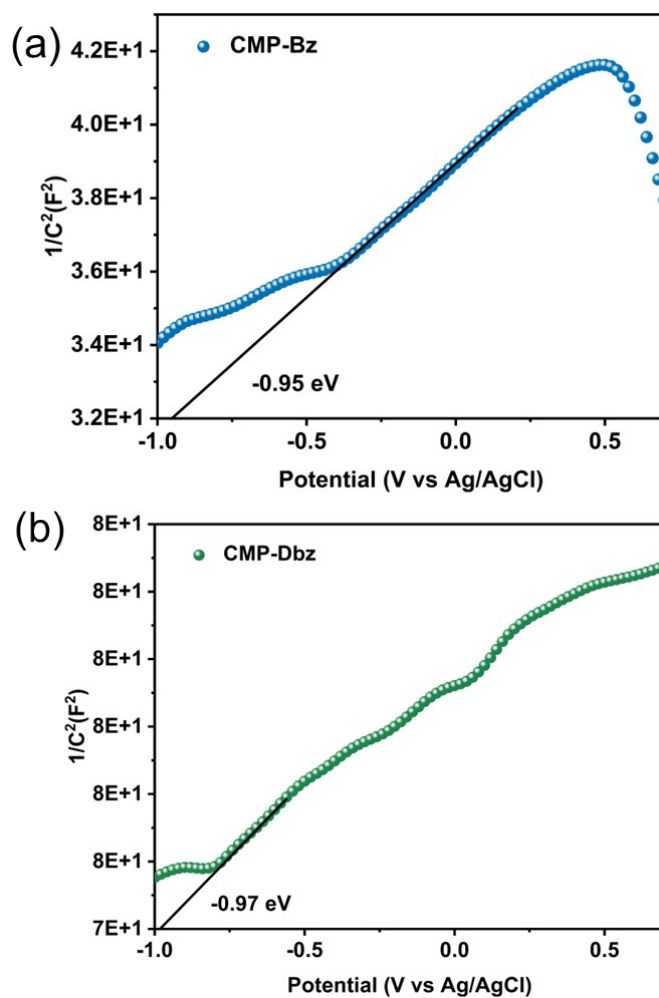

63

64

Fig.S3. Mott-Schottky curves for CMP-Bz and CMP-Dbz.

65

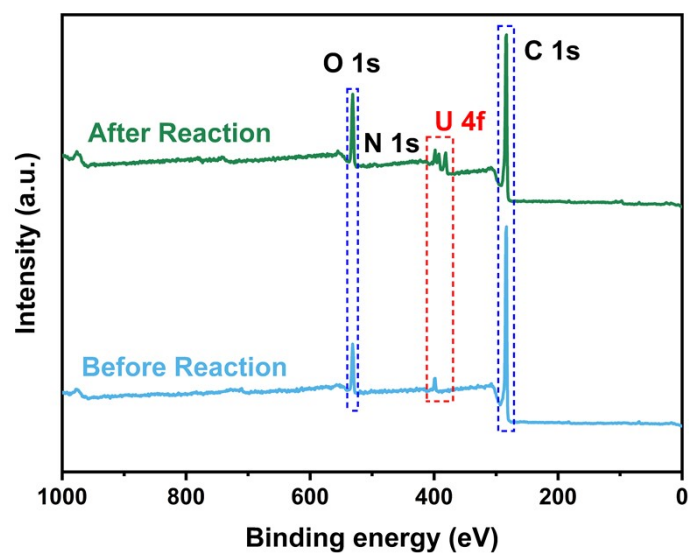

Fig.S4. XPS survey of CMP-Dbz before and after reaction.

66

67

68

69

## 70 Reference

- 71 [1] Z. Li, Z. Dong, Z. Zhang, B. Wei, C. Meng, W. Zhai, Y. Wang, X. Cao, B. Han, Y. Liu.  
 72 Covalent Organic Frameworks for Boosting H<sub>2</sub>O<sub>2</sub> Photosynthesis via the Synergy of Multiple  
 73 Charge Transfer Channels and Polarized Field. *Angew. Chem. Int. Ed.*, 2025. 64: e202420218.

74
